# Supplementary material for: Comparison of Laboratory and Hemodynamic Time Series Data Across Original, Alpha, and Delta Variants in Patients With Multisystem Inflammatory Syndrome in Children
Source: PubMed Central journal article supplement — Pediatr Crit Care Med. 2022 May 4;23(8):e372–81. doi: 10.1097/PCC.0000000000002976 (PMC9345524; doi:10.1097/pcc.0000000000002976), 2022-05-04

**Cardiac - ICU sub-group**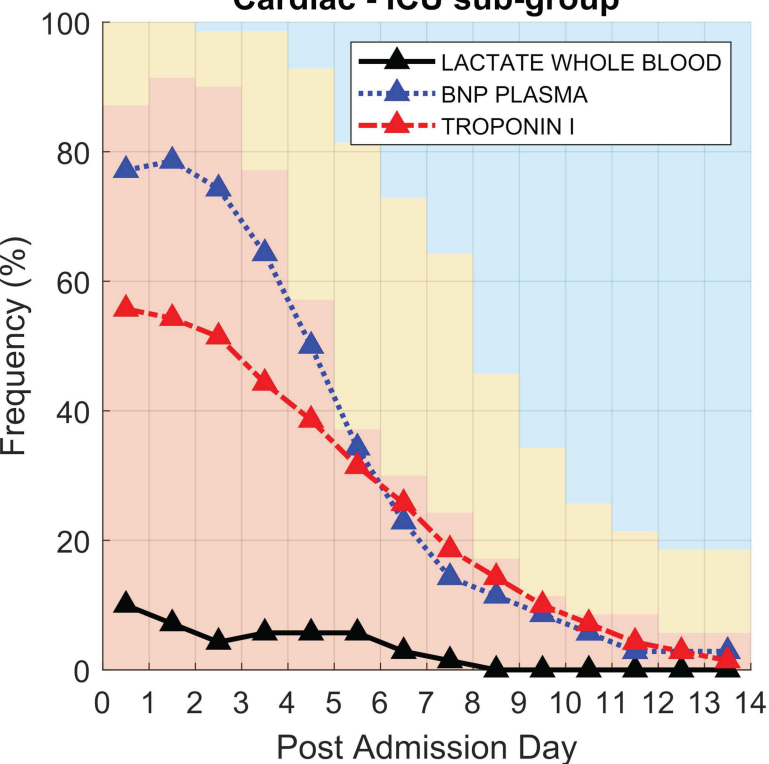**Cardiac - Non ICU sub-group**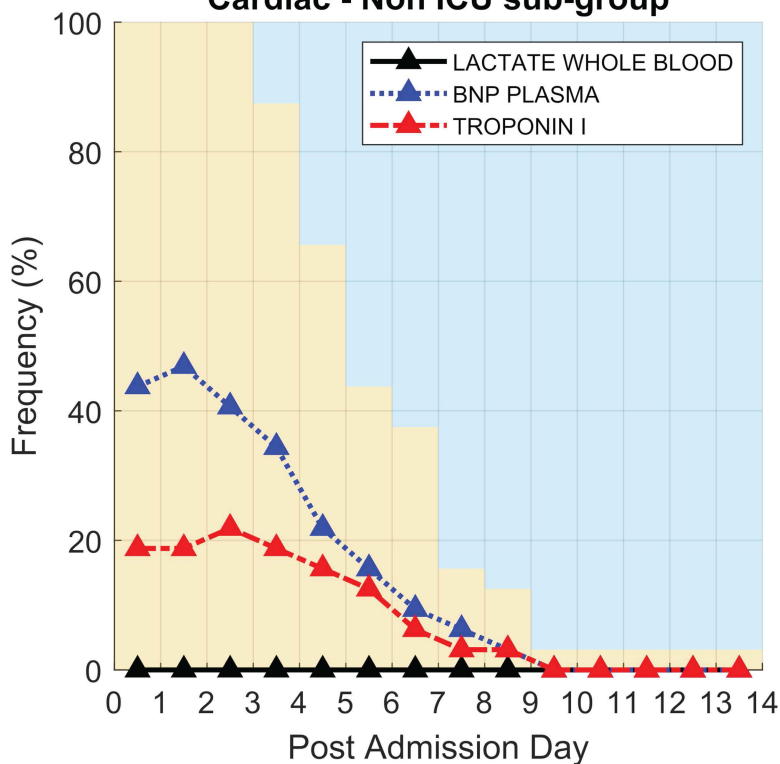**GI-Liver - ICU sub-group**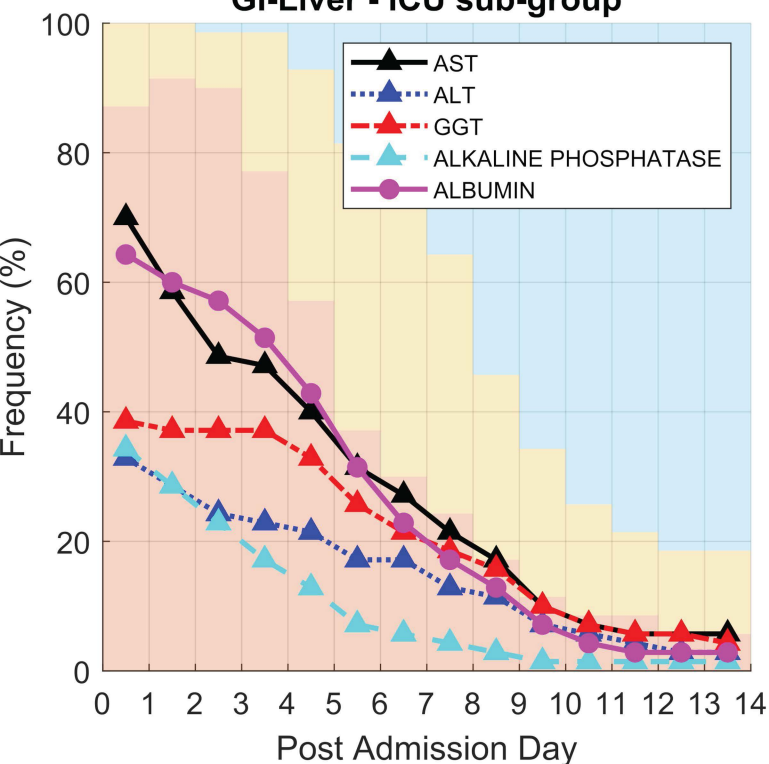**GI-Liver - Non ICU sub-group**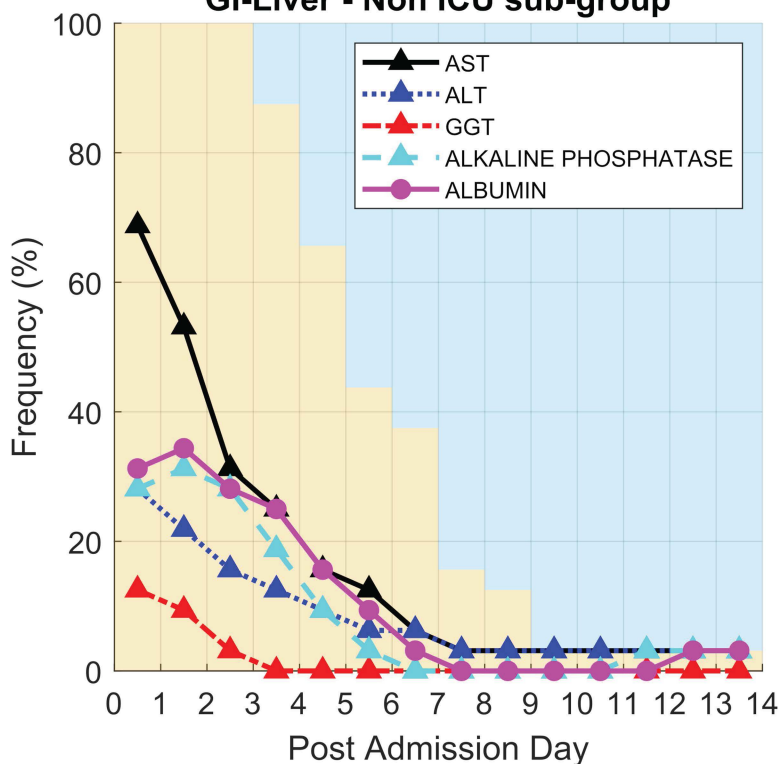**Renal - ICU sub-group**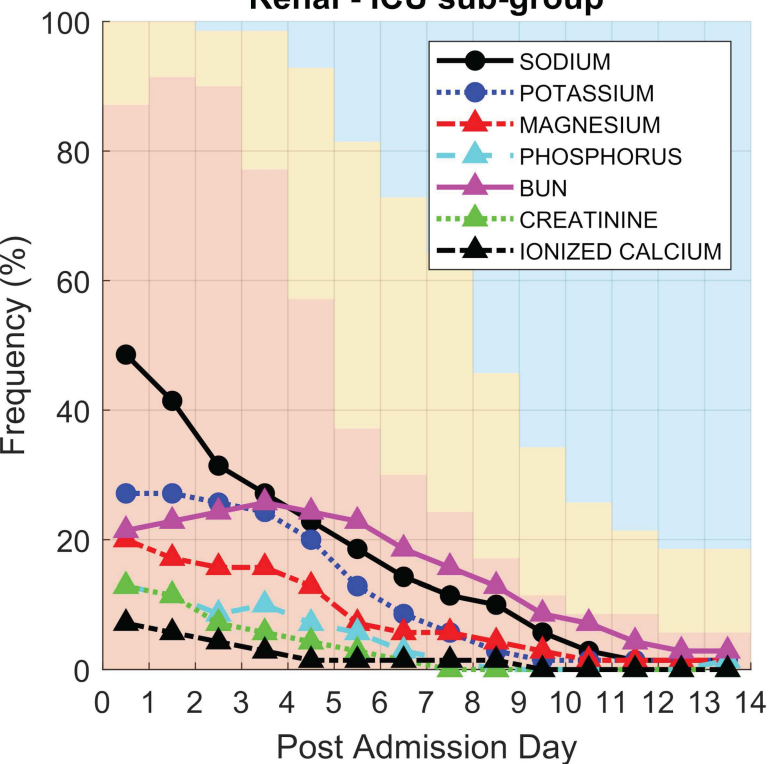**Renal - Non ICU sub-group**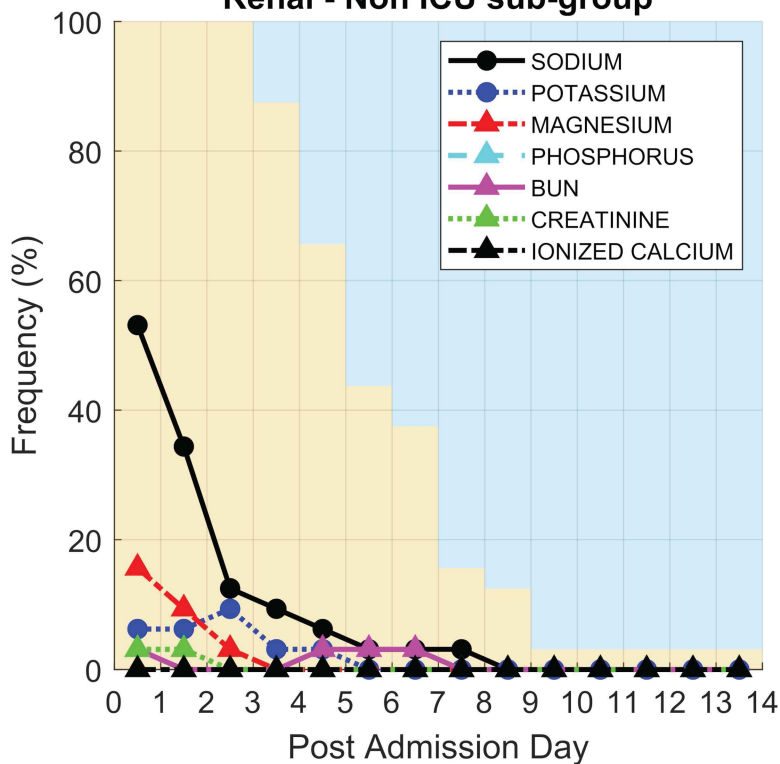

Supplement: pcc-23-e372-s003.pdf [file pcc-23-e372-s003.pdf]
